# Supplementary material for: A single bacterium restores the microbiome dysbiosis to protect bones from destruction in a rat model of rheumatoid arthritis
Source: Springer Nature journal article supplement (doi:10.1186/s40168-019-0719-1), 2019-07-17

Normalized log<sub>10</sub> fold change

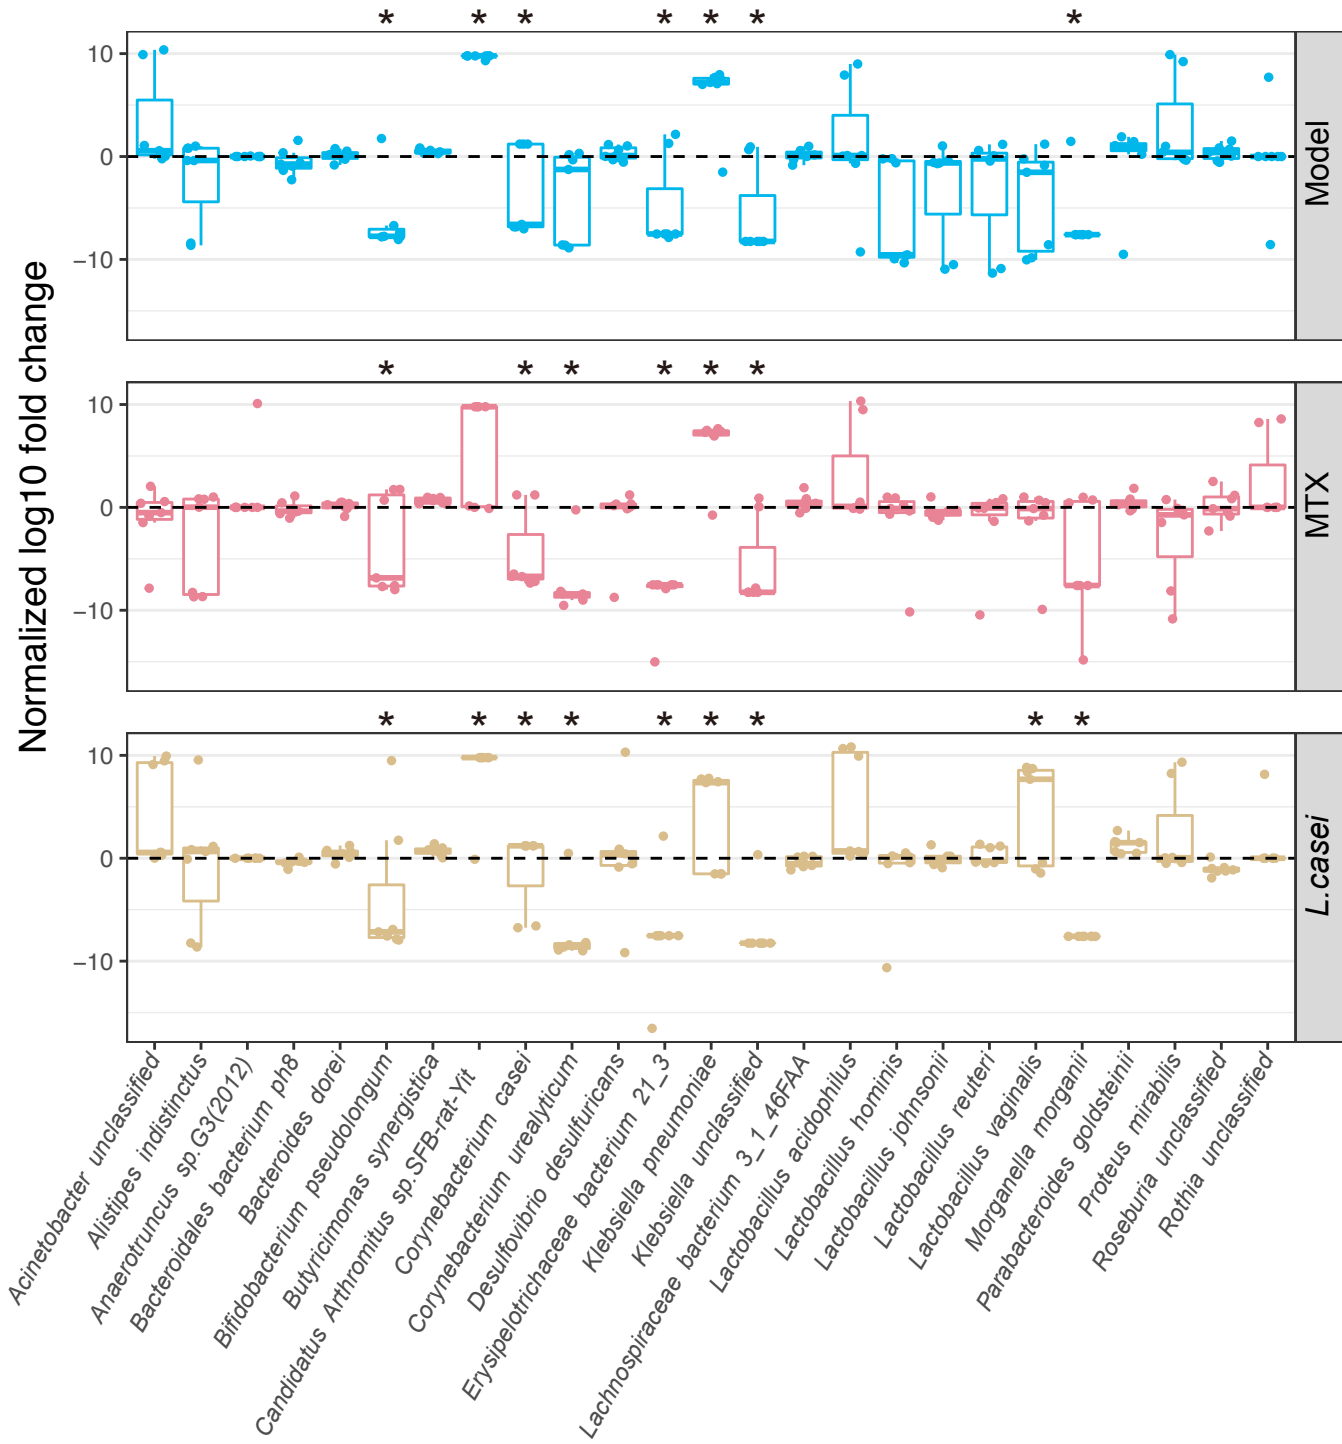

Supplement: 40168_2019_719_MOESM7_ESM.pdf [file 40168_2019_719_MOESM7_ESM.pdf]
