# Supplementary material for: A single bacterium restores the microbiome dysbiosis to protect bones from destruction in a rat model of rheumatoid arthritis
Source: Springer Nature journal article supplement (doi:10.1186/s40168-019-0719-1), 2019-07-17
Supplement: 40168_2019_719_MOESM9_ESM.pdf [file 40168_2019_719_MOESM9_ESM.pdf]

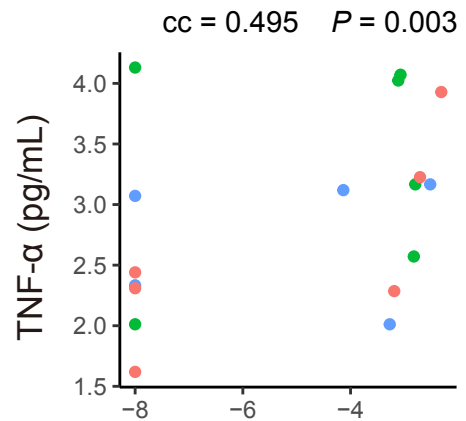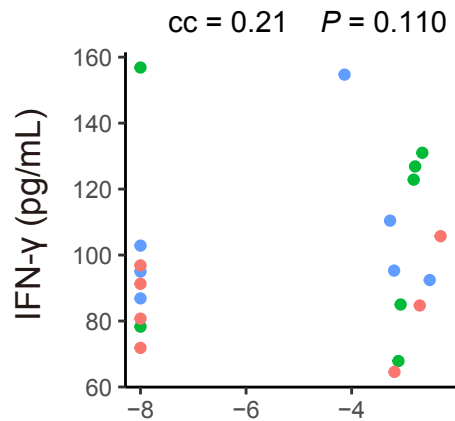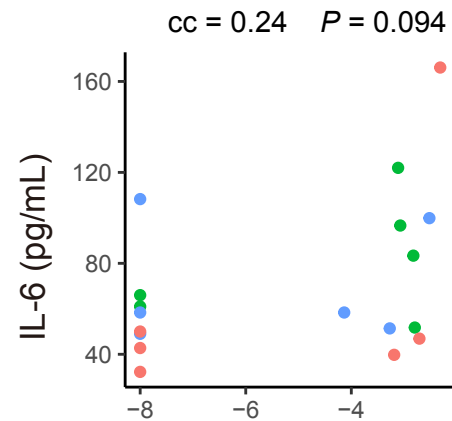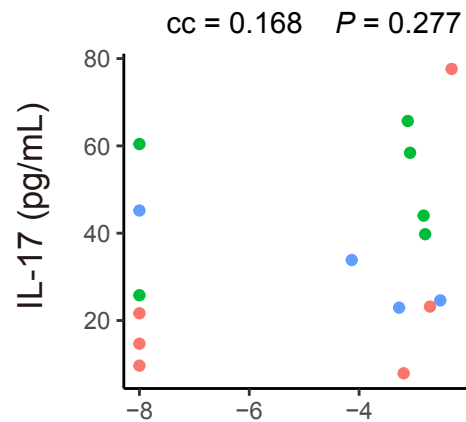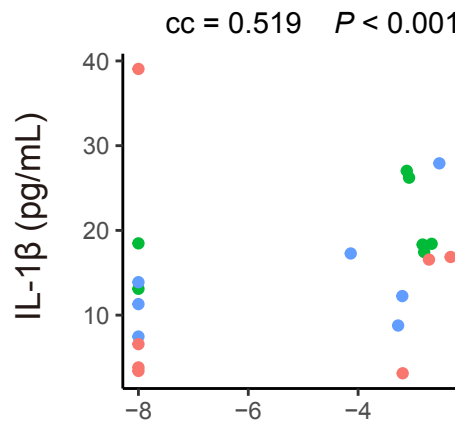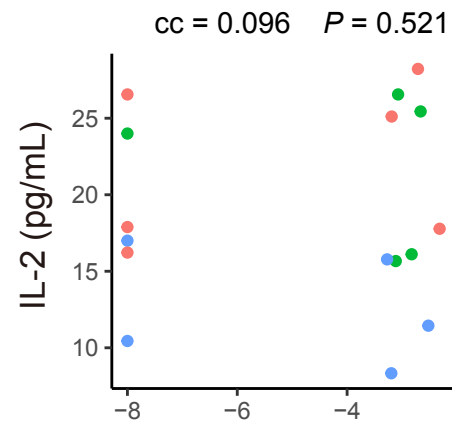

- *L.casei*
- Model
- MTX

*Desulfovibrio desulfuricans* abundance ( $\log_{10}$ )
