# Supplementary material for: A single bacterium restores the microbiome dysbiosis to protect bones from destruction in a rat model of rheumatoid arthritis
Source: Springer Nature journal article supplement (doi:10.1186/s40168-019-0719-1), 2019-07-17
Supplement: 40168_2019_719_MOESM13_ESM.pdf [file 40168_2019_719_MOESM13_ESM.pdf]

cc = -0.356 P = 0.011

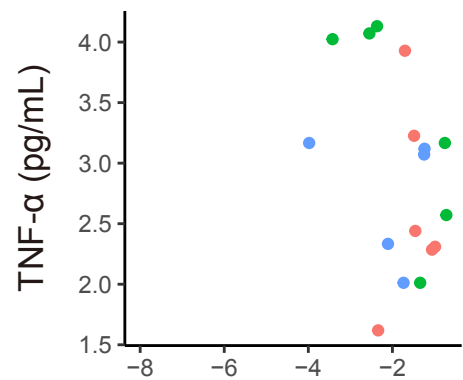

cc = 0.235 P = 0.073

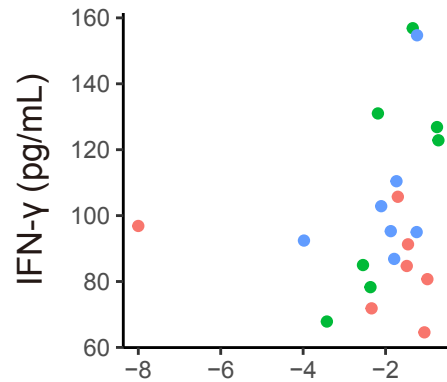

cc = -0.100 P = 0.489

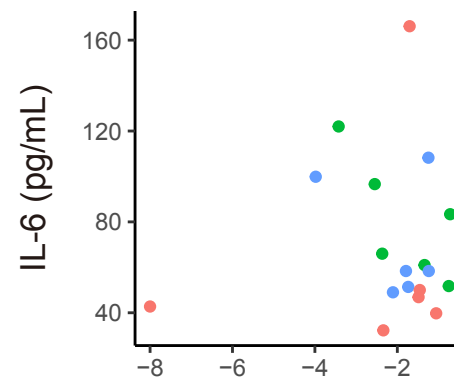

- *L.casei*
- Model
- MTX

cc = -0.058 P = 0.710

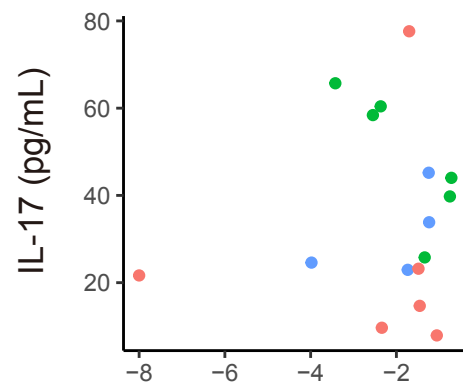

cc = -0.321 P = 0.016

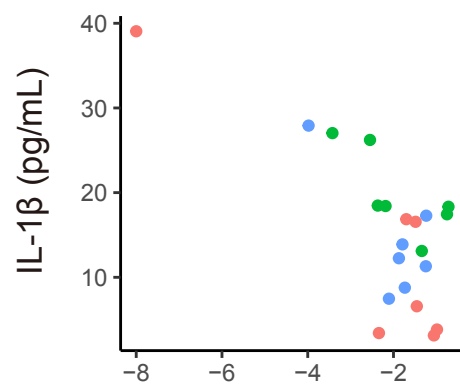

cc = 0.11 P = 0.463

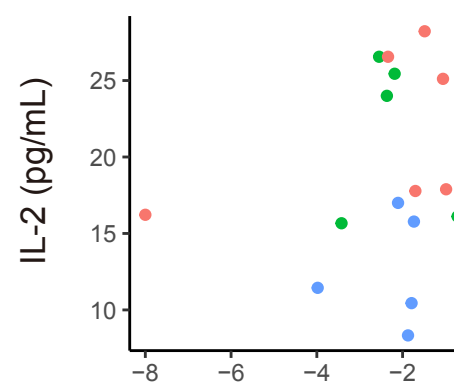

*Lactobacillus reuteri* abundance (log<sub>10</sub>)
